# Supplementary material for: Increase in bacterial community induced tolerance to Cr in response to soil properties and Cr level in the soil
Source: Copernicus journal article supplement (doi:10.5194/soil-9-561-2023), 2023-11-17
Supplement: Supplementary file 1 [file soil-9-561-2023-supplement.pdf]

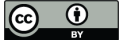

*Supplement of*

## **Increase in bacterial community induced tolerance to Cr in response to soil properties and Cr level in the soil**

**Claudia Campillo-Cora et al.**

*Correspondence to:* Claudia Campillo-Cora ([ccampillo@uvigo.es](mailto:ccampillo@uvigo.es))

The copyright of individual parts of the supplement might differ from the article licence.

## 1. Soil samples characterization

Soil texture was determined after wet sieving and the international pipette method (Day, 1965). Soil pH was measured in a ratio of 1:2.5 soil/distilled water for pH<sub>w</sub> and soil/0.1M KCl for pH<sub>k</sub> by a glass electrode (Crison, Spain) (Gutián and Carballas, 1976). Organic matter content was determined by loss on ignition (3 h, 550°C) (Hoogsteen et al., 2015). Total carbon (TC) and nitrogen (TN) were determined using a Thermo Finnigan EA 1112 elemental analyzer (Thermo, USA). Dissolved Organic Carbon (DOC) was measured in a 1:5 soil:water suspension using an Analyzer Multi N/C 2100 (Analytik Jena, Germany). The effective cation exchange capacity (eCEC) was calculated as the sum of exchangeable basic cations (Na, K, Ca, and Mg), extracted with 0.2 M NH<sub>4</sub>Cl (Sumner and Miller, 1996), and of exchangeable aluminium (Al), extracted with 1 M KCl (Bertsch and Bloom, 1996). Na and K were measured by Atomic Emission Spectroscopy, and Ca, Mg and Al by Atomic Absorption Spectroscopy (AAS) using a Thermo Soolar Spectrometer (Thermo, USA).

Fe and Al associated with organic matter (Fe<sub>om</sub>, Al<sub>om</sub>) were extracted by using a 0.1 M Na-pyrophosphate solution (Bascomb, 1968). Inorganic non-crystalline Fe and Al oxyhydroxides and metal-hummus complexes (Fe<sub>ox</sub>, Al<sub>ox</sub>) were extracted with 0.2 M ammonium oxalate-oxalic acid (Blakemore, 1978). Inorganic amorphous Fe and Al (Fe<sub>ia</sub>, Al<sub>ia</sub>) were calculated by the difference between Fe<sub>ox</sub> and Fe<sub>om</sub> and between Al<sub>ox</sub> and Al<sub>om</sub>, respectively. Total free Fe (Fe<sub>t</sub>), including Fe-hummus complexes, non-crystalline and crystalline Fe oxyhydroxides were determined through extraction with Na-dithionite-citrate (Holmgren, 1967). To measure total free aluminium (Al<sub>t</sub>), a solution of 0.5 M NaOH was used as extractant. (Fe, Al) bound to crystalline structures (Fe<sub>c</sub>, Al<sub>c</sub>) were calculated by the difference between Fe<sub>t</sub> and Fe<sub>ox</sub> and between Al<sub>t</sub> and Al<sub>ox</sub>, respectively. All (Fe, Al)-extracts were measured by AAS using a Thermo Soolar

Spectrometer. The total amount of Cr, Cu, Ni, Pb and Zn was determined by soil digestions with HNO<sub>3</sub>, HF and HCl (Reed and Martens, 1996) in a MarsXpress microwave oven (CEM Corporation, USA) and measuring Cr, Cu, Ni, Pb and Zn by AAs. Adapted data from Campillo-Cora et al. (2021b).

## Tables

**Table S1.** Parent material, particle size distribution, soil pH, Dissolved Organic Carbon (DOC), organic matter, effective cation exchange capacity (eCEC), total carbon and total nitrogen (Campillo-Cora et al., 2020)

| Soil | Parent Material | Sand          | Silt | Clay | pH <sub>w</sub> | pH <sub>K</sub> | DOC                | OM   | Ca                                              | Mg            | Na  | K   | Al    | eCEC | C    | N   |
|------|-----------------|---------------|------|------|-----------------|-----------------|--------------------|------|-------------------------------------------------|---------------|-----|-----|-------|------|------|-----|
|      |                 | ----- % ----- | %    | %    |                 |                 | g·kg <sup>-1</sup> | %    | ----- cmol <sub>c</sub> ·kg <sup>-1</sup> ----- | ----- % ----- | %   |     |       |      |      |     |
| 1    | Granite         | 71            | 13   | 16   | 4.0             | 3.0             | 0.62               | 13.6 | 1.9                                             | 1.0           | 0.1 | 0.2 | 4.8   | 8.0  | 7.0  | 0.5 |
| 2    | Granite         | 62            | 19   | 19   | 4.6             | 3.8             | 0.70               | 14.1 | 3.4                                             | 1.2           | 0.2 | 1.6 | 2.7   | 9.1  | 6.7  | 0.4 |
| 3    | Schist          | 50            | 25   | 25   | 4.8             | 4.2             | 0.33               | 11.6 | 1.9                                             | 0.4           | 0.2 | 0.2 | 3.2   | 5.8  | 8.2  | 0.6 |
| 4    | Amphibolite     | 46            | 29   | 20   | 4.9             | 4.5             | 0.14               | 12.0 | 1.7                                             | 0.2           | 0.1 | 0.2 | 0.9   | 3.1  | 3.7  | 0.3 |
| 5    | Granite         | 68            | 16   | 16   | 4.9             | 4.2             | 0.30               | 11.2 | 0.4                                             | 0.1           | 0.1 | 0.1 | 1.2   | 1.9  | 5.0  | 0.4 |
| 6    | Limestone       | 19            | 67   | 14   | 6.3             | 5.8             | 0.56               | 14.4 | 21.4                                            | 1.2           | 0.7 | 0.2 | <0.2* | 23.4 | 6.5  | 0.5 |
| 7    | Limestone       | 20            | 52   | 28   | 7.5             | 6.9             | 0.53               | 14.8 | 27.8                                            | 1.1           | 0.1 | 0.1 | <0.2* | 29.1 | 5.5  | 0.4 |
| 8    | Amphibolite     | 32            | 37   | 32   | 5.0             | 4.5             | 0.27               | 10.0 | 2.1                                             | 0.4           | 0.3 | 0.2 | 1.1   | 4.1  | 6.7  | 0.4 |
| 9    | Amphibolite     | 45            | 35   | 19   | 4.7             | 4.3             | 0.25               | 19.6 | 3.3                                             | 0.4           | 0.2 | 0.3 | 2.6   | 6.8  | 10.3 | 0.8 |
| 10   | Amphibolite     | 31            | 45   | 24   | 4.9             | 4.4             | 0.44               | 29.1 | 3.7                                             | 0.4           | 0.4 | 0.5 | 1.9   | 6.9  | 14.3 | 1.0 |

Sand %, silt % and clay % are soil texture fractions; pH<sub>w</sub> and pH<sub>K</sub> are pH measured in water and 0.1 KCl, respectively; DOC is Dissolved Organic Matter; OM % is organic matter; Ca, Mg, Na and K are exchangeable bases, Al is exchangeable Al; eCEC is cation exchange capacity. C % and N % are total carbon and nitrogen, respectively.

\*values below the limit of detection

**Table S2.** (Fe, Al) compounds in the 10 studied soils and heavy metal content (adapted from Campillo-Cora et al. (2021b))

| Soil | Fe <sub>om</sub>   | Fe <sub>ia</sub> | Fe <sub>c</sub> | Al <sub>om</sub> | Al <sub>ia</sub> | Al <sub>c</sub> | Cr  | Cu  | Ni  | Pb | Zn  |
|------|--------------------|------------------|-----------------|------------------|------------------|-----------------|-----|-----|-----|----|-----|
|      | g·kg <sup>-1</sup> |                  |                 |                  |                  |                 |     |     |     |    |     |
| 1    | 0.80               | 0.05             | 0.53            | 1.19             | 0.22             | 0.39            | 8   | 6   | 5   | 28 | 52  |
| 2    | 2.09               | <0.01            | 0.54            | 2.94             | <0.01*           | 0.40            | 9   | 6   | 7   | 48 | 40  |
| 3    | 4.34               | 2.12             | 17.59           | 11.44            | <0.01*           | 5.04            | 87  | 40  | 65  | 26 | 118 |
| 4    | 4.63               | 2.05             | 24.56           | 8.99             | 1.14             | 12.24           | 373 | 106 | 196 | 7  | 124 |
| 5    | 0.93               | 0.05             | 0.59            | 4.24             | <0.01*           | 0.94            | 7   | 4   | 9   | 54 | 56  |
| 6    | 0.91               | 2.55             | 37.40           | 3.32             | 5.27             | <0.01*          | 103 | 70  | 185 | 84 | 203 |
| 7    | 1.53               | 3.67             | 32.21           | 1.53             | 2.95             | <0.01*          | 88  | 40  | 133 | 57 | 139 |
| 8    | 6.57               | 2.16             | 45.89           | 10.72            | 3.51             | 6.50            | 394 | 69  | 255 | 11 | 161 |
| 9    | 5.56               | 2.76             | 50.23           | 11.03            | 3.79             | <0.01*          | 286 | 63  | 79  | 19 | 117 |
| 10   | 4.36               | 1.37             | 47.50           | 16.97            | 7.22             | <0.01*          | 222 | 64  | 118 | 23 | 132 |

Fe<sub>om</sub> and Al<sub>om</sub> are (Fe, Al)-humus complexes; Fe<sub>ia</sub> and Al<sub>ia</sub> are (Fe, Al)-inorganic amorphous oxyhydroxides; Fe<sub>c</sub> and Al<sub>c</sub> are (Fe, Al)-crystalline oxyhydroxides

\*values below the limit of detection

**Table S3** Freundlich and Langmuir adsorption constants (Campillo-Cora et al., 2020)

| Soil | Freundlich     |      | Langmuir |                |
|------|----------------|------|----------|----------------|
|      | K <sub>f</sub> | n    | β        | K <sub>L</sub> |
| 1    | 186.19         | 0.31 | 753.40   | 0.16           |
| 2    | 135.83         | 0.34 | 758.18   | 0.06           |
| 3    | 61.29          | 0.43 | 574.40   | 0.03           |
| 4    | 41.40          | 0.45 | 448.96   | 0.03           |
| 5    | 91.22          | 0.44 | 858.56   | 0.04           |
| 6    | 25.78          | 0.76 | 2257.96  | 0.01           |
| 7    | 3.26           | 1.19 |          |                |
| 8    | 85.36          | 0.45 | 944.39   | 0.03           |
| 9    | 68.00          | 0.47 | 897.99   | 0.02           |
| 10   | 109.12         | 0.44 | 1041.21  | 0.04           |

K<sub>F</sub> is the Freundlich's affinity coefficient; n is Freundlich's linearity index; β is the maximum sorption capacity of the soil; K<sub>L</sub> is the Langmuir's constant referred to adsorption energy

**Table S4**

Chromium extraction from studied soils (n=10) using H<sub>2</sub>O, CaCl<sub>2</sub> and DTPA, as a function of the added Cr concentrations (Campillo-Cora et al., 2021a)

| Added Cr<br>(mg·kg <sup>-1</sup> )          | H <sub>2</sub> O Cr (mg·kg <sup>-1</sup> ) |     |        |      |       |      |       |       |       |      |
|---------------------------------------------|--------------------------------------------|-----|--------|------|-------|------|-------|-------|-------|------|
|                                             | S1                                         | S2  | S3     | S4   | S5    | S6   | S7    | S8    | S9    | S10  |
| 2000                                        | *                                          | *   | 1312.3 | 40.2 | 517.9 | 32.2 | 179.2 | 147.9 | 124.4 | 31.5 |
| 1000                                        | *                                          | *   | 407.2  | 10.7 | 171.7 | *    | 32.3  | 21.5  | 19.0  | 11.9 |
| 500                                         | *                                          | *   | 135.5  | 3.2  | 21.1  | *    | 15.0  | 8.5   | 6.2   | 7.3  |
| 250                                         | *                                          | *   | 33.2   | 3.4  | *     | *    | 11.4  | 3.1   | 10.2  | 4.7  |
| 125                                         | *                                          | *   | 8.8    | 6.3  | *     | *    | 6.3   | 3.1   | 11.9  | 6.6  |
| 62.5                                        | *                                          | *   | 1.6    | 3.5  | *     | *    | 6.2   | 6.9   | 13.7  | 5.4  |
| 31.25                                       | *                                          | *   | *      | 1.5  | *     | *    | 7.1   | 10.2  | 10.4  | 2.7  |
| 0                                           | *                                          | *   | *      | 1.2  | 6.6   | *    | *     | 7.6   | 12.1  | 4.2  |
| CaCl <sub>2</sub> Cr (mg·kg <sup>-1</sup> ) |                                            |     |        |      |       |      |       |       |       |      |
| 2000                                        | *                                          | *   | 881.2  | 14.1 | 195.3 | 7.1  | 88.1  | 39.8  | 29.9  | 5.3  |
| 1000                                        | *                                          | *   | 210.2  | 3.1  | 30.5  | *    | 4.2   | 3.6   | 3.3   | 1.8  |
| 500                                         | *                                          | *   | 66.6   | *    | 2.0   | *    | 1.5   | 0.2   | 0.3   | 0.6  |
| 250                                         | *                                          | *   | 15.9   | *    | *     | *    | 0.9   | 0.4   | *     | *    |
| 125                                         | *                                          | *   | 1.5    | *    | *     | *    | 0.5   | *     | *     | *    |
| 62.5                                        | *                                          | *   | *      | *    | *     | *    | 0.4   | 0.7   | *     | *    |
| 31.25                                       | *                                          | *   | *      | *    | *     | *    | 0.5   | 0.4   | *     | *    |
| 0                                           | *                                          | *   | *      | *    | *     | *    | *     | 0.3   | *     | *    |
| DTPA Cr (mg·kg <sup>-1</sup> )              |                                            |     |        |      |       |      |       |       |       |      |
| 2000                                        | 5.6                                        | 5.3 | 420.0  | 10.4 | 170.9 | 4.3  | 30.9  | 22.8  | 26.3  | 7.0  |
| 1000                                        | 4.1                                        | 3.1 | 154.5  | 4.2  | 51.2  | 0.5  | 1.7   | 5.0   | 4.9   | 2.9  |
| 500                                         | 2.8                                        | 2.9 | 51.9   | 2.4  | 11.3  | *    | 0.1   | 1.3   | 1.4   | 1.5  |
| 250                                         | 1.1                                        | 1.6 | 18.1   | 1.1  | 2.3   | *    | *     | 0.6   | 0.2   | 0.5  |
| 125                                         | 0.4                                        | 0.3 | 4.8    | *    | 0.2   | *    | *     | *     | *     | 0.1  |
| 62.5                                        | *                                          | *   | 0.5    | *    | *     | *    | *     | *     | *     | 1.0  |
| 31.25                                       | *                                          | *   | *      | *    | *     | *    | *     | *     | *     | 0.7  |
| 0                                           | *                                          | *   | *      | *    | *     | *    | *     | *     | *     | 0.6  |

\*values below the limit of detection (<0.02 mg·kg<sup>-1</sup> for H<sub>2</sub>O and CaCl<sub>2</sub> Cr determinations, and <0.1 mg·kg<sup>-1</sup> for DTPA Cr)

**Table S5**Explained variance ( $R^2$ ) from log IC<sub>50</sub> fitting to the logistic model

| <b>Cr (mg·kg<sup>-1</sup>)</b> | <b>2000</b> | <b>1000</b> | <b>500</b> | <b>250</b> | <b>125</b> | <b>62.5</b> | <b>31.25</b> | <b>0</b> |
|--------------------------------|-------------|-------------|------------|------------|------------|-------------|--------------|----------|
| <b>S1</b>                      | <i>0.99</i> | <i>0.99</i> | 0.99       | 0.99       | 0.99       | 0.99        | 0.99         | 0.99     |
| <b>S2</b>                      | <i>0.96</i> | <i>0.95</i> | 0.96       | 0.96       | 0.94       | 0.96        | 0.98         | 0.99     |
| <b>S3</b>                      | *           | *           | 0.87       | 0.99       | 0.98       | 0.98        | 0.99         | 0.99     |
| <b>S4</b>                      | <i>0.99</i> | <i>0.99</i> | 0.99       | 0.99       | 0.99       | 0.99        | 0.99         | 0.99     |
| <b>S5</b>                      | *           | <i>0.99</i> | 0.99       | 0.99       | 0.99       | 0.99        | 0.99         | 0.99     |
| <b>S6</b>                      | *           | <i>0.98</i> | 0.99       | 0.99       | 0.97       | 0.98        | 0.99         | 0.99     |
| <b>S7</b>                      | *           | <i>0.99</i> | 0.99       | 0.98       | 0.98       | 0.99        | 0.99         | 0.99     |
| <b>S8</b>                      | <i>0.98</i> | <i>0.99</i> | 0.99       | 0.99       | 0.99       | 0.99        | 0.99         | 0.98     |
| <b>S9</b>                      | *           | *           | 0.98       | 0.96       | 0.95       | 0.99        | 0.99         | 0.99     |
| <b>S10</b>                     | *           | *           | 0.98       | 0.99       | 0.99       | 0.98        | 0.99         | 0.99     |

\*Unadjusted data

## References

- Bascomb, C.L., 1968. Distribution of pyrophosphate-extractable iron and organic carbon in soils of various groups. *Journal of Soil Science* 19, 251–268. doi:10.1111/j.1365-2389.1968.tb01538.x
- Bertsch, P.M., Bloom, P.R., 1996. Aluminum, in: Bigham, J.M. (Ed.), *Methods of Soil Analysis Part 3. Chemical Methods*, Soil Science Society of America, Madison, WI, pp. 517–550.
- Blakemore, L.C., 1978. Exchange complex dominated by amorphous material (ECDAM), in: Smith, G.D. (Ed.), *The Andisol Proposal*. Soil Bureau, Lower Hutt, New Zealand, pp. 21–22.
- Campillo-Cora, C., Conde-Cid, M., Arias-Estévez, M., Fernández-Calviño, D., Alonso-Vega, F., 2020. Specific adsorption of heavy metals in soils: Individual and competitive experiments. *Agronomy* 10, 1113. doi:10.3390/agronomy10081113
- Campillo-Cora, C., Rodríguez-González, L., Arias-Estévez, M., Fernández-Calviño, D., Soto-Gómez, D., 2021a. Influence of physicochemical properties and parent material on chromium fractionation in soils. *Processes* 9, 1073. doi:10.3390/pr9061073
- Campillo-Cora, C., Soto-Gómez, D., Arias-Estévez, M., Bååth, E., Fernández-Calviño, D., 2021b. Bacterial community tolerance to Cu in soils with geochemical baseline concentrations (GBCs) of heavy metals: Importance for pollution induced community tolerance (PICT) determinations using the leucine incorporation method. *Soil Biology and Biochemistry* 155, 108157. doi:10.1016/j.soilbio.2021.108157
- Day, P.R., 1965. Particle Fractionation and Particle-Size Analysis. *Methods of Soil Analysis, Part 1: Physical and Mineralogical Properties, Including Statistics of Measurement and Sampling* 545–567. doi:10.2134/AGRONMONOGR9.1.C43
- Gutián, F., Carballas, T., 1976. *Técnicas de análisis de suelos*. Pico Sacro, Santiago de Compostela, Spain.
- Holmgren, G.G.S., 1967. A rapid citrate-dithionite extractable iron procedure. *Soil Science Society of America Journal* 31, 212–215.
- Hoogsteen, M.J.J., Lantinga, E.A., Bakker, E.J., Groot, J.C.J., Tittonell, P.A., 2015. Estimating soil organic carbon through loss on ignition: Effects of ignition conditions and structural water loss. *European Journal of Soil Science* 66, 320–328. doi:10.1111/ejss.12224
- Reed, S.T., Martens, D.C., 1996. Copper and Zinc, in: Bigham, J. (Ed.), *Methods of Soil Analysis Part 3. Chemical Methods*, Soil Science Society of America, pp. 703–722.
- Sumner, M.E., Miller, W.P., 1996. Cation Exchange Capacity and Exchange Coefficients, in: Bigham, J.M. (Ed.), *Methods of Soil Analysis Part 3. Chemical Methods*, Soil Science Society of America, Madison, WI, pp. 1201–1230.
